# Supplementary material for: Prognostic prediction of glioblastoma by quantitative assessment of the methylation status of the entire MGMT promoter region
Source: BMC Cancer. 2014 Aug 30;14:641. doi: 10.1186/1471-2407-14-641 (PMC4161852; doi:10.1186/1471-2407-14-641)
Supplement: Supplementary file 3 — Additional file 3: Table S2: Table of regression coefficients of CpG sites based on OS. (XLS 34 KB) [file 12885_2014_4817_MOESM3_ESM.xls]

## Sheet: Sheet1
Table S2. Regression coefficient of CpG site based on OS.
	p-value	regression coefficient
CpG1	0.0733056	-0.0168297
CpG2	0.134634	-0.0155083
CpG3	0.437592	-0.00830388
CpG4	0.141901	-0.0193194
CpG5	0.0440006	-0.0233751
CpG6	0.076754	-0.0176813
CpG7	0.0932242	-0.0269413
CpG8	0.0385266	-0.0207284
CpG9	0.118274	-0.0188021
CpG10	0.065715	-0.0237971
CpG11	0.0640941	-0.0224514
CpG12	0.378092	-0.0131244
CpG13	0.937616	0.00138595
CpG14	0.461624	-0.00843354
CpG15	0.623977	-0.00507813
CpG16	0.419004	-0.0100907
CpG17	0.196312	-0.0144779
CpG18	0.350534	-0.0155985
CpG19	0.343975	-0.0139334
CpG20	0.142005	-0.020194
CpG21	0.196983	-0.0148763
CpG22	0.369343	-0.00900885
CpG23	0.129469	-0.01978
CpG24	0.285039	-0.0105539
CpG25	0.271312	-0.0141214
CpG26	0.153007	-0.0223494
CpG27	0.1012	-0.0364602
CpG28	0.040769	-0.142048
CpG29	0.326189	-0.0248141
CpG30	0.420682	-0.0137551
CpG31	0.471159	-0.00998283
CpG32	0.85673	-0.00297542
CpG33	0.340502	-0.0127139
CpG34	0.218016	-0.0211039
CpG35	0.0833283	-0.0494085
CpG36	0.153678	-0.0225625
CpG37	0.074591	-0.0270281
CpG38	0.178258	-0.022201
CpG39	0.44874	0.0286589
CpG40	0.110803	-0.0332386
CpG41	0.844146	0.00610753
CpG42	0.806024	0.0271224
CpG43	0.980237	0.00376907
CpG44	0.0985948	0.0895367
CpG45	0.0494454	0.494908
CpG46	0.54517	-0.0373565
CpG47	0.133893	-0.0375884
CpG48	0.202602	-0.027857
CpG49	0.446322	-0.0152775
CpG50	0.712616	0.00582734
CpG51	0.757779	0.00458945
CpG52	0.519712	-0.00597796
CpG53	0.578512	-0.00503182
CpG54	0.135854	-0.0144165
CpG55	0.773569	-0.00333773
CpG56	0.0409129	-0.0245152
CpG57	0.355604	-0.0103753
CpG58	0.193925	-0.0107537
CpG59	0.141855	-0.0115682
CpG60	0.134061	-0.0128958
CpG61	0.142971	-0.0116266
CpG62	0.121487	-0.0110075
CpG63	0.0542565	-0.0169722
CpG64	0.0583865	-0.0186865
CpG65	0.145119	-0.0109319
CpG66	0.157628	-0.0114307
CpG67	0.0868314	-0.022743
CpG68	0.110894	-0.0122451
CpG69	0.35317	-0.00899099
CpG70	0.210573	-0.0102325
CpG71	0.155353	-0.0160528
CpG72	0.295678	-0.0082846
CpG73	0.790224	-0.00575576
CpG74	0.115034	-0.0247502
CpG75	0.069141	-0.0481755
CpG76	0.662071	-0.0047542
CpG77	0.0622627	-0.020831
